# Supplementary material for: Comparative Chloroplast Genome Analyses of the Winter-Blooming Eastern Asian Endemic Genus Chimonanthus (Calycanthaceae) With Implications For Its Phylogeny and Diversification
Source: Front Genet. 2021 Nov 30;12:709996. doi: 10.3389/fgene.2021.709996 (PMC8670589; doi:10.3389/fgene.2021.709996)
Supplement: Supplementary file 4 [file Table6.xlsx]

## Sheet: Sheet1
Supplementary Table S6. Non-synonymous (Ka) versus synonumous (Ks) substitutions of 78 protein coding genes. Cc: C. campanulatus; Cg: C. grammatus; Cn: C. nitens (b); Cs: C. salicifolius; Cz: C. zhejiangensis
gene	Species	Ks	Ka	Ka/ks
accD	Cc	0.0062	0	0
	Cg	0.0031	0.0008	0.258065
	Cn	0	0	0
	Cs	0	0	0
	Cz	0	0	0
atpA	Cc	0.0134	0.0026	0.19403
	Cg	0.008	0	0
	Cn	0.008	0	0
	Cs	0.008	0	0
	Cz	0.008	0	0
atpE	Cc	0.0108	0	0
	Cg	0.0217	0	0
	Cn	0.0108	0	0
	Cs	0.0108	0	0
	Cz	0.0108	0	0
atpF	Cc	0.0053	0.0102	1.92453
	Cg	0.008	0	0
	Cn	0.008	0	0
	Cs	0.008	0	0
	Cz	0.008	0	0
ccsA	Cc	0	0	0
	Cg	0.0092	0	0
	Cn	0.0046	0	0
	Cs	0.0046	0.0013	0.282609
	Cz	0.0046	0	0
cemA	Cc	0.0067	0.0019	0.283582
	Cg	0.0067	0	0
	Cn	0.0067	0	0
	Cs	0.0067	0	0
	Cz	0.0067	0	0
clpP	Cc	0	0.0044	0
	Cg	0	0	0
	Cn	0	0	0
	Cs	0	0	0
	Cz	0	0	0
ihbA	Cc	0	0	0
	Cg	0	0.0072	0
	Cn	0	0.0072	0
	Cs	0	0	0
	Cz	0	0	0
matK	Cc	0	0.0051	0
	Cg	0.0059	0.0051	0.864407
	Cn	0.0059	0.0051	0.864407
	Cs	0.0088	0.006	0.681818
	Cz	0.0059	0.0051	0.864407
ndhA	Cc	0	0	0
	Cg	0.0036	0	0
	Cn	0.0036	0.0012	0.333333
	Cs	0.0036	0	0
	Cz	0.0036	0	0
ndhB	Cc	0	0	0
	Cg	0	0.0009	0
	Cn	0	0.0009	0
	Cs	0	0.0009	0
	Cz	0	0.0009	0
	Cc	0	0.0018	0
ndhD	Cg	0.0083	0.0009	0.108434
	Cn	0	0.0009	0
	Cs	0	0.0018	0
	Cz	0	0.0009	0
ndhE	Cc	0	0.0043	0
	Cg	0	0	0
	Cn	0	0	0
	Cs	0	0	0
	Cz	0	0	0
ndhF	Cc	0.0075	0.0012	0.16
	Cg	0.0094	0.0012	0.12766
	Cn	0.0075	0.0018	0.24
	Cs	0.0075	0.0018	0.24
	Cz	0.0075	0.0024	0.32
ndhG	Cc	0.0077	0.0051	0.662338
	Cg	0.0077	0.0025	0.324675
	Cn	0	0.0025	0
	Cs	0	0.0025	0
	Cz	0	0.0025	0
ndhH	Cc	0	0	0
	Cg	0.0075	0.0022	0.293333
	Cn	0.0075	0.0011	0.146667
	Cs	0.0075	0.0011	0.146667
	Cz	0.0113	0.0011	0.0973451
ndhJ	Cc	0.0089	0	0
	Cg	0	0	0
	Cn	0	0	0
	Cs	0	0	0
	Cz	0	0	0
ndhK	Cc	0	0.002	0
	Cg	0	0.002	0
	Cn	0	0	0
	Cs	0	0	0
	Cz	0	0	0
petA	Cc	0.0132	0.0027	0.204545
	Cg	0.0133	0.0014	0.105263
	Cn	0.0177	0.0014	0.079096
	Cs	0.0177	0.0014	0.079096
	Cz	0.0177	0.0014	0.079096
petd	Cc	0.008	0	0
	Cg	0.008	0	0
	Cn	0.008	0	0
	Cs	0.008	0	0
	Cz	0.008	0	0
psaA	Cc	0.0019	0.0012	0.631579
	Cg	0.0038	0.0006	0.157895
	Cn	0.0038	0.0006	0.157895
	Cs	0.0038	0.0006	0.157895
	Cz	0.0038	0.0006	0.157895
psaB	Cc	0.002	0	0
	Cg	0.0059	0	0
	Cn	0.0079	0.0006	0.0759494
	Cs	0.0079	0.0006	0.0759494
	Cz	0.0079	0.0006	0.0759494
psaC	Cc	0	0.0054	0
	Cg	0	0.0054	0
	Cn	0	0.0054	0
	Cs	0	0.0054	0
	Cz	0	0.0054	0
psbA	Cc	0.012	0	0
	Cg	0	0	0
	Cn	0.004	0	0
	Cs	0	0	0
	Cz	0	0	0
psbB	Cc	0.0055	0	0
	Cg	0.0027	0	0
	Cn	0.0027	0.0009	0.333333
	Cs	0.0027	0	0
	Cz	0.0027	0	0
psbC	Cc	0.0029	0	0
	Cg	0.0058	0	0
	Cn	0.0058	0	0
	Cs	0.0058	0.0009	0.155172
	Cz	0.0058	0	0
psbH	Cc	0.0183	0	0
	Cg	0.0183	0	0
	Cn	0.0183	0	0
	Cs	0.0183	0	0
	Cz	0.0183	0	0
psbI	Cc	0	0	0
	Cg	0.0385	0	0
	Cn	0.0385	0	0
	Cs	0.0385	0	0
	Cz	0.0385	0	0
psbK	Cc	0.026	0	0
	Cg	0.026	0	0
	Cn	0.026	0	0
	Cs	0.026	0	0
	Cz	0.026	0	0
psbT	Cc	0	0	0
	Cg	0.042	0	0
	Cn	0.042	0	0
	Cs	0.042	0	0
	Cz	0.042	0	0
rbcL	Cc	0	0.0009	0
	Cg	0.0029	0.0028	0.965517
	Cn	0	0.0028	0
	Cs	0	0.0028	0
	Cz	0	0.0028	0
rpl2	Cc	0	0.0016	0
	Cg	0	0	0
	Cn	0	0	0
	Cs	0	0.0016	0
	Cz	0	0	0
rpl14	Cc	0	0	0
	Cg	0	0	0
	Cn	0.0115	0	0
	Cs	0.0115	0	0
	Cz	0.0115	0	0
rpl16	Cc	0.0096	0	0
	Cg	0	0	0
	Cn	0	0	0
	Cs	0	0	0
	Cz	0	0	0
rpl2	Cc	0	0	0
	Cg	0.0113	0	0
	Cn	0.0228	0.0038	0.166667
	Cs	0.0227	0	0
	Cz	0.0227	0	0
rpl22	Cc	0	0	0
	Cg	0.0106	0	0
	Cn	0.0106	0	0
	Cs	0.0106	0	0
	Cz	0.0106	0	0
rpl33	Cc	0	0	0
	Cg	0	0	0
	Cn	0.023	0	0
	Cs	0.023	0	0
	Cz	0.023	0	0
rpoA	Cc	0.0045	0.0013	0.288889
	Cg	0	0.0038	0
	Cn	0	0.0038	0
	Cs	0	0.0038	0
	Cz	0	0.0038	0
rpoB	Cc	0.0013	0.0016	1.23077
	Cg	0.0027	0.0012	0.444444
	Cn	0.0054	0.0012	0.222222
	Cs	0.0054	0.0012	0.222222
	Cz	0.004	0.0012	0.3
rpoC1	Cc	0.0021	0.0006	0.285714
	Cg	0.0062	0.0026	0.419355
	Cn	0.0041	0.0006	0.146341
	Cs	0.0041	0.0006	0.146341
	Cz	0.0041	0.0006	0.146341
rpoC2	Cc	0.001	0.0022	2.2
	Cg	0.0031	0.0022	0.709677
	Cn	0.0041	0.0022	0.536585
	Cs	0.0041	0.0022	0.536585
	Cz	0.0041	0.0022	0.536585
rps2	Cc	0	0.0018	0
	Cg	0.0125	0.0018	0.144
	Cn	0.0125	0.0018	0.144
	Cs	0.0125	0.0018	0.144
	Cz	0.0125	0.0018	0.144
rps3	Cc	0	0.0019	0
	Cg	0	0	0
	Cn	0.0077	0	0
	Cs	0	0	0
	Cz	0	0	0
rps4	Cc	0.0067	0	0
	Cg	0.0067	0	0
	Cn	0.0135	0.0022	0.162963
	Cs	0.0135	0	0
	Cz	0.0135	0	0
rps7	Cc	0	0	0
	Cg	0.0089	0	0
	Cn	0	0	0
	Cs	0	0	0
	Cz	0	0	0
rps8	Cc	0.0104	0	0
	Cg	0	0	0
	Cn	0	0	0
	Cs	0	0	0
	Cz	0	0	0
rps8	Cc	0.0104	0	0
	Cg	0	0	0
	Cn	0	0	0
	Cs	0	0	0
	Cz	0	0	0
rps14	Cc	0	0	0
	Cg	0	0	0
	Cn	0.0144	0	0
	Cs	0.0144	0	0
	Cz	0.029	0	0
rps15	Cc	0	0.005	0
	Cg	0	0	0
	Cn	0	0	0
	Cs	0	0	0
	Cz	0	0	0
rps16	Cc	0	0.0057	0
	Cg	0	0	0
	Cn	0	0	0
	Cs	0	0	0
	Cz	0	0	0
rps18	Cc	0	0	0
	Cg	0	0.0043	0
	Cn	0	0.0043	0
	Cs	0	0.0043	0
	Cz	0	0.0043	0
ycf2	Cc	0.0007	0.0004	0.571429
	Cg	0.0007	0.0004	0.571429
	Cn	0	0.0002	0
	Cs	0	0.0002	0
	Cz	0	0.0002	0
ycf3	Cc	0	0.0013	0
	Cg	0	0.0013	0
	Cn	0	0.0013	0
	Cs	0	0.002	0
	Cz	0	0.0013	0
ycf4	Cc	0	0.0024	0
	Cg	0	0	0
	Cn	0	0.0024	0
	Cs	0	0.0024	0
	Cz	0	0.0024	0
rps19	Cc	0	0	0
	Cg	0	0	0
	Cn	0	0	0
	Cs	0	0	0
	Cz	0	0	0
rps11	Cc	0	0	0
	Cg	0	0	0
	Cn	0	0	0
	Cs	0	0	0
	Cz	0	0	0
rpl36	Cc	0	0	0
	Cg	0	0	0
	Cn	0	0	0
	Cs	0	0	0
	Cz	0	0	0
rpl32	Cc	0	0	0
	Cg	0	0	0
	Cn	0	0	0
	Cs	0	0	0
	Cz	0	0	0
rpl23	Cc	0	0	0
	Cg	0	0	0
	Cn	0	0	0
	Cs	0	0	0
	Cz	0	0	0
psbN	Cc	0	0	0
	Cg	0	0	0
	Cn	0	0	0
	Cs	0	0	0
	Cz	0	0	0
psbM	Cc	0	0	0
	Cg	0	0	0
	Cn	0	0	0
	Cs	0	0	0
	Cz	0	0	0
psbL	Cc	0	0	0
	Cg	0	0	0
	Cn	0	0	0
	Cs	0	0	0
	Cz	0	0	0
psbJ	Cc	0	0	0
	Cg	0	0	0
	Cn	0	0	0
	Cs	0	0	0
	Cz	0	0	0
psbF	Cc	0	0	0
	Cg	0	0	0
	Cn	0	0	0
	Cs	0	0	0
	Cz	0	0	0
psbE	Cc	0	0	0
	Cg	0	0	0
	Cn	0	0	0
	Cs	0	0	0
	Cz	0	0	0
psbD	Cc	0	0	0
	Cg	0	0	0
	Cn	0	0	0
	Cs	0	0	0
	Cz	0	0	0
psaJ	Cc	0	0	0
	Cg	0	0	0
	Cn	0	0	0
	Cs	0	0	0
	Cz	0	0	0
psaI	Cc	0	0	0
	Cg	0	0	0
	Cn	0	0	0
	Cs	0	0	0
	Cz	0	0	0
petN	Cc	0	0	0
	Cg	0	0	0
	Cn	0	0	0
	Cs	0	0	0
	Cz	0	0	0
petL	Cc	0	0	0
	Cg	0	0	0
	Cn	0	0	0
	Cs	0	0	0
	Cz	0	0	0
petG	Cc	0	0	0
	Cg	0	0	0
	Cn	0	0	0
	Cs	0	0	0
	Cz	0	0	0
petB	Cc	0	0	0
	Cg	0	0	0
	Cn	0	0	0
	Cs	0	0	0
	Cz	0	0	0
ndhI	Cc	0	0	0
	Cg	0	0	0
	Cn	0	0	0
	Cs	0	0	0
	Cz	0	0	0
ndhC	Cc	0	0	0
	Cg	0	0	0
	Cn	0	0	0
	Cs	0	0	0
	Cz	0	0	0
infA	Cc	0	0	0
	Cg	0	0	0
	Cn	0	0	0
	Cs	0	0	0
	Cz	0	0	0
atpI	Cc	0	0	0
	Cg	0	0	0
	Cn	0	0	0
	Cs	0	0	0
	Cz	0	0	0
atpH	Cc	0	0	0
	Cg	0	0	0
	Cn	0	0	0
	Cs	0	0	0
	Cz	0	0	0
atpB	Cc	0	0	0
	Cg	0	0	0
	Cn	0	0	0
	Cs	0	0	0
	Cz	0	0	0
78
